# Supplementary material for: lncRNA FOXD3-AS1 promotes the progression of non-small cell lung cancer by regulating the miR-135a-5p/CDK6 axis
Source: PubMed Central journal article supplement — Oncol Lett. 2021 Oct 26;22(6):853. doi: 10.3892/ol.2021.13114 (PMC8561623; doi:10.3892/ol.2021.13114), 2021-10-26

Figure S1. Relative genes expression after transfection. (A) Relative expression levels of miR-135a-5p in A549 and H1229 cells transfected with miR-135a-5p mimics. (B) Relative expression levels of miR-135a-5p in A549 and H1229 cells transfected with miR-135a-5p inh. (C) Protein expression levels of CDK6 in A549 and H1229 cells transfected with OE CDK6. \*\*P<0.01. miR, microRNA; CDK6, cyclin-dependent kinase 6; OE, overexpression; NC, negative control; inh, inhibitor.

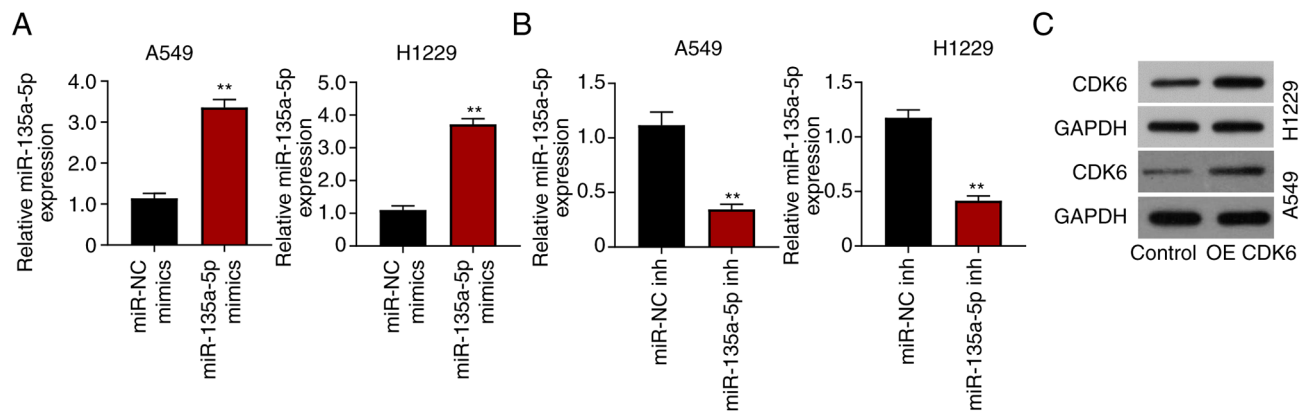

Figure S2. Cell cycle progression of A549 and H1229 cells transfected with sh-FOXD3-AS1 was evaluated by cell cycle assay. Percentages of cells in each cell cycle phase (G0/G1, S and G2/M) were determined. Data are presented as a histogram. \*\*P<0.01. sh, short hairpin RNA; FOXD3-AS1, forkhead box D3 antisense 1; NC, negative control.

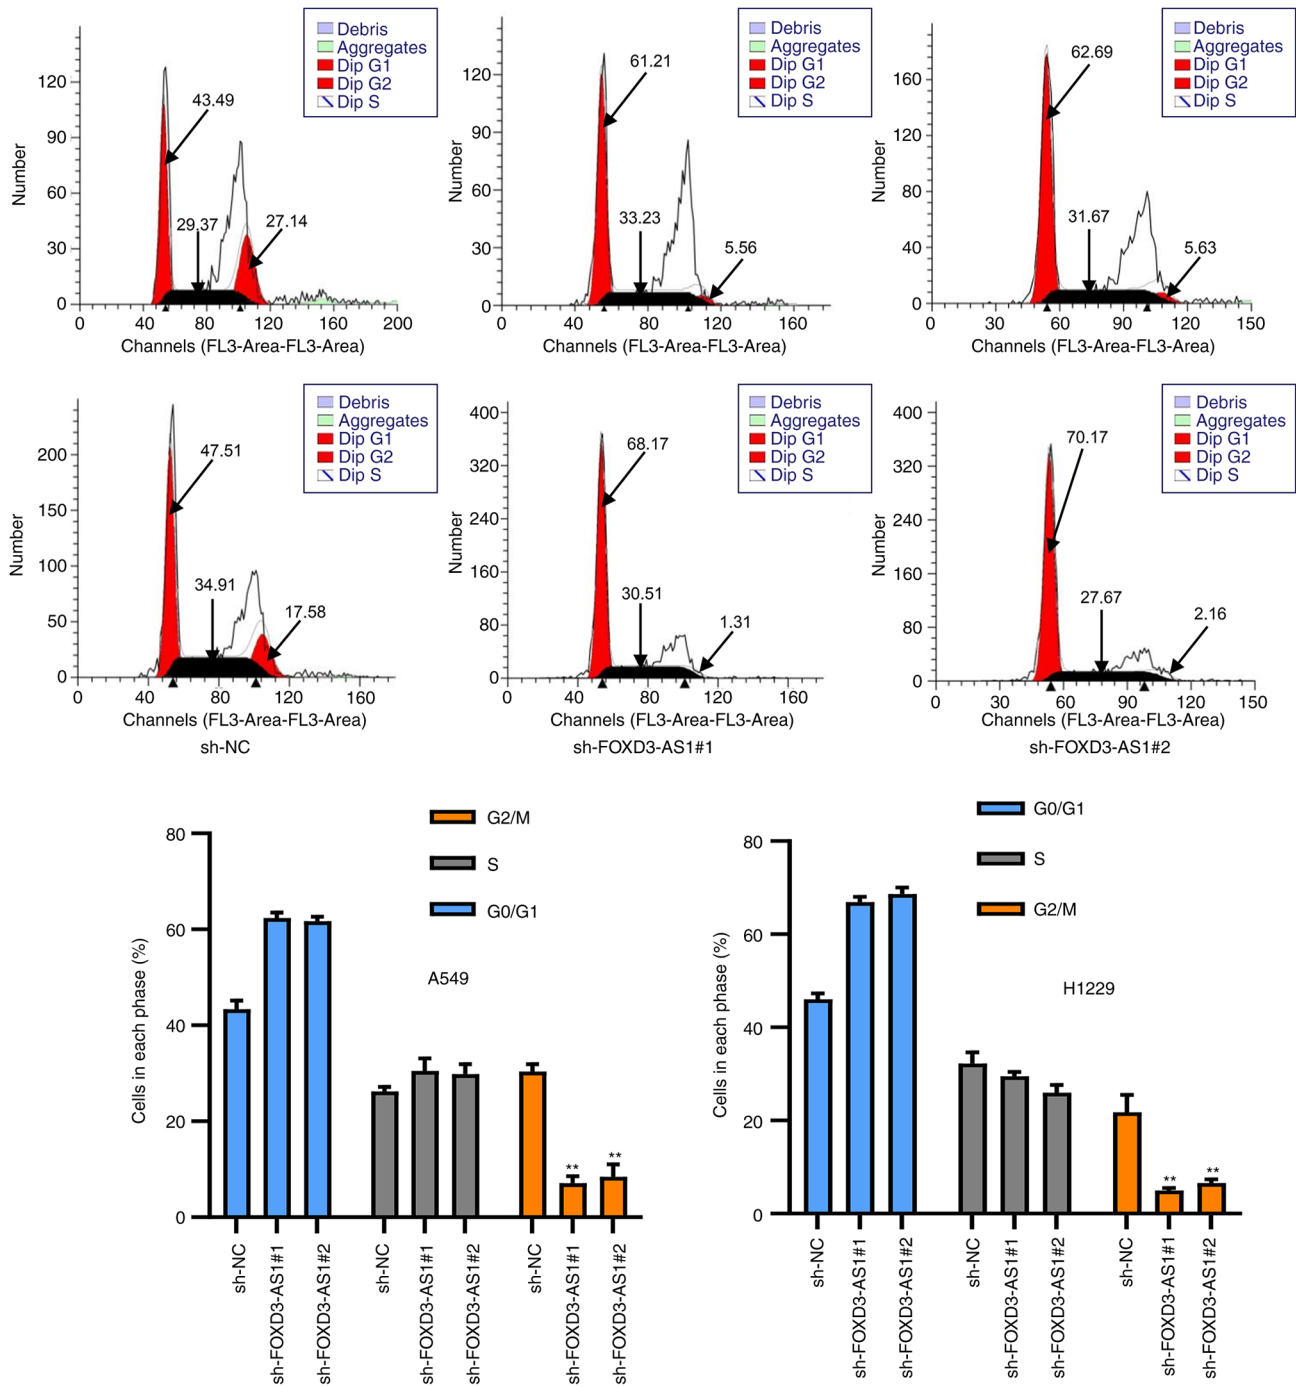

Supplement: Supplementary_Data.pdf [file Supplementary_Data.pdf]
